# Supplementary material
Source: ML conference proceedings conference paper supplement (https://openreview.net/forum?id=oJA1GUqRww)

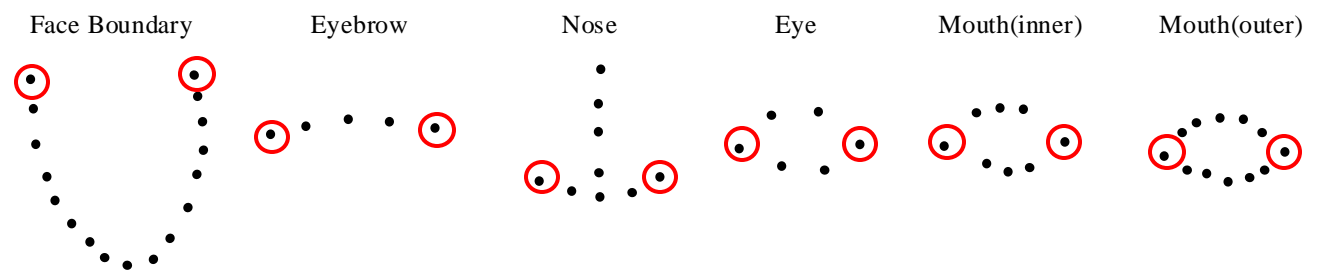

Figure R9: Illustration of the endpoints in each part, marked with a red circle.

Supplement: supplementary_material [file attachment]
